# Supplementary material for: Synthetic lung surfactants containing SP-B and SP-C peptides plus novel phospholipase-resistant lipids or glycerophospholipids
Source: PeerJ. 2016 Oct 27;4:e2635. doi: 10.7717/peerj.2635 (PMC5088750; doi:10.7717/peerj.2635)
Supplement: Data S1 — Page 1 (Fig. 4) shows the captive bubble surfactometry (CBS) data of the first 10 quasi-static cycles of 3% S-MB DATK, 3% SP-Css ion-lock 1 or 1.5% S-MB DATK + 1.5% SP-Css ion-lock 1 in 35 mg/ml of DPPC:POPC:POPG 5:3:2 (wt:wt:wt) or DPPC:POPC:POPG 5:3:2 (wt:wt:wt) = lipids alone. Page 2 (Fig. 5) provides similar CBS data as Page 1 for 35 mg/ml of DEPN-8 (n = 4), 35 mg/ml of DEPN-8:PG-1 9:1 (wt:wt) (n = 4), and 3% S-MB DATK (n = 3) and 1.5% S-MB DATK + 1.5% SP-Css ion-lock 1 (n = 4) in 35 mg/ml of DEPN-8:PG-1 9:1 (wt:wt). Page 3 (Fig. 6) shows the lung function data (arterial oxygenation = PaO2 in mmHg and dynamic compliance in ml/kg/cm H2O) of 29 ventilated, lavaged, surfactant-deficient rabbits treated with 3% S-MB DATK (n = 9), 3% SP-Css ion-lock 1 (n = 6), or 1.5% S-MB DATK + 1.5% SP-Css ion-lock 1 (n = 5) in 35 mg/ml of DPPC:POPC:POPG 5:3:2 (wt:wt:wt) or DPPC:POPC:POPG 5:3:2 (wt:wt:wt) alone (n = 9). Page 4 (Fig. 7) shows the lung function data (arterial oxygenation = PaO2 in mmHg and dynamic compliance in ml/kg/cm H2O) of 23 ventilated, lavaged, surfactant-deficient rats treated at time 0 with phospholipase-resistant surfactants consisting of 35 mg/ml of DEPN-8:PG-1 9:1 (wt:wt) with 3% S-MB DATK (n = 8) or 1.5% S-MB DATK + 1.5% SP-Css ion-lock 1 (n = 7) or DEPN-8 alone (n = 8) [file peerj-04-2635-s001.xlsx]

## Sheet: Page 1
Figure 4: CBS data of S-MB DATK, SP-Css ion-lock 1 or combi in DPPC:POPC:POPG 5:3:2 wt:wt:wt
	S-MB DATK				SP-Css ion-lock 1				S-MB DATK + SP-Css ion-lock 1				Lipids
	minima		maxima		minima		maxima		minima		maxima		minima		maxima
Cycle #	Average	SEM	Average	SEM	Average	SEM	Average	SEM	Average	SEM	Average	SEM	Average	SEM	Average	SEM
0	29.9874	4.24219	29.9874	4.24219	29.2421	1.94149	29.2421	1.94149	30.0668	4.8258	30.0668	4.8258	57.0591	1.37012	57.0591	1.37012
1	0.384952	0.10191	46.9729	2.09314	0.98334	0.348465	40.2654	2.56408	0.695572	0.134402	40.9623	1.38576	17.7029	0.413537	60.249	0.447945
2	0.724773	0.196728	45.3471	1.49349	0.848917	0.157418	40.7	1.81137	0.760227	0.166522	42.7942	1.73417	17.915	0.355292	59.8634	0.409814
3	0.387657	0.0245679	45.3891	2.692	1.26664	0.211636	39.4053	2.09018	1.38341	0.251743	42.284	1.18447	18.1195	0.363578	60.5209	0.786917
4	0.778293	0.272092	45.0097	1.55114	0.995992	0.157644	40.2636	2.0233	1.13625	0.402904	41.705	1.80325	18.0465	0.264226	60.4515	0.784595
5	0.646087	0.146011	45.9848	1.37971	1.26825	0.236843	38.906	2.37909	0.925013	0.372914	39.4409	3.56429	17.9203	0.314314	60.699	0.61473
6	0.502862	0.168796	45.7369	1.17757	0.984095	0.231029	40.513	2.73822	0.920217	0.359043	42.9064	2.39819	18.0613	0.350658	60.617	0.726886
7	0.596345	0.109956	46.5662	1.54515	1.27984	0.171595	38.1339	1.28696	0.7754	0.278754	42.8242	2.60538	18.4152	0.412499	61.05	0.994955
8	0.4394	0.0983327	45.7206	1.19846	1.27102	0.124549	40.5905	2.52087	0.876793	0.258734	40.3753	3.15432	18.4027	0.274019	61.0622	0.945416
9	0.46867	0.0768011	46.9627	1.10388	1.49638	0.119787	40.085	2.08124	0.826137	0.268598	42.8326	2.25616	18.3007	0.224082	60.7071	0.856866
10	0.387295	0.142241	45.9676	1.44196	1.39375	0.134159	41.0229	0.594673	0.867443	0.408966	41.9334	3.0032	18.3835	0.319697	60.7767	1.10631
S-MB DATK 3% in DPPC:POPC:POPG 5:3:2
	minima			maxima				1		2		3		4
Cycle #	Average	S.D.	SEM	Average	S.D.	SEM		minima	maxima	minima	maxima	minima	maxima	minima	maxima
0	29.9874	8.48439	4.24219	29.9874	8.48439	4.24219		42.6429	42.6429	24.5419	24.5419	26.6521	26.6521	26.1125	26.1125
1	0.384952	0.203819	0.10191	46.9729	4.18628	2.09314		0.14022	46.7149	0.30236	41.848	0.50203	47.2397	0.5952	52.0888
2	0.724773	0.393457	0.196728	45.3471	2.98699	1.49349		1.23707	46.9746	0.3251	40.9221	0.53449	47.3044	0.80243	46.1872
3	0.387657	0.0491358	0.0245679	45.3891	5.38401	2.692		0.34192	51.0138	0.34988	38.079	0.41854	46.7149	0.44029	45.7488
4	0.778293	0.544185	0.272092	45.0097	3.10227	1.55114		1.58237	46.6326	0.61201	41.0198	0.53298	48.132	0.38581	44.2546
5	0.646087	0.292022	0.146011	45.9848	2.75942	1.37971		1.05575	46.6326	0.37542	42.0708	0.62702	48.5588	0.52616	46.677
6	0.502862	0.337591	0.168796	45.7369	2.35515	1.17757		1.00873	46.7641	0.34828	42.2786	0.34146	46.3735	0.31298	47.5313
7	0.596345	0.219913	0.109956	46.5662	3.09029	1.54515		0.84093	47.1065	0.67063	42.1742	0.31669	49.4004	0.55713	47.5836
8	0.4394	0.196665	0.0983327	45.7206	2.39693	1.19846		0.47058	45.9061	0.70556	42.2786	0.29328	47.5104	0.28818	47.1871
9	0.46867	0.153602	0.0768011	46.9627	2.20776	1.10388		0.62347	47.3744	0.57493	44.034	0.36507	49.3849	0.31121	47.0576
10	0.387295	0.284482	0.142241	45.9676	2.88392	1.44196		0.09601	48.1587	0.77737	42.7122	0.31662	48.6195	0.35918	44.3801
SP-Css ion-lock 1 in DPPC:POPC:POPG 5:3:2
	minima			maxima				1		2		3		4
Cycle #	Average	S.D.	SEM	Average	S.D.	SEM		minima	maxima	minima	maxima	minima	maxima	minima	maxima
0	29.2421	3.88299	1.94149	29.2421	3.88299	1.94149		26.9402	26.9402	33.1998	33.1998	25.0304	25.0304	31.7979	31.7979
1	0.98334	0.696931	0.348465	40.2654	5.12817	2.56408		0.77331	41.7141	1.88737	44.8799	0.21507	32.9256	1.05761	41.542
2	0.848917	0.314835	0.157418	40.7	3.62274	1.81137		0.63452	41.1522	0.56259	44.6411	0.95087	35.859	1.24769	41.1478
3	1.26664	0.423272	0.211636	39.4053	4.18035	2.09018		1.88901	40.8454	0.97782	40.2014	1.02541	33.4283	1.17431	43.1462
4	0.995992	0.315288	0.157644	40.2636	4.0466	2.0233		1.18356	39.9838	0.92819	41.8789	0.58166	34.8238	1.29056	44.368
5	1.26825	0.473687	0.236843	38.906	4.75819	2.37909		1.27761	39.6279	1.84208	44.0617	0.68194	32.536	1.27136	39.3984
6	0.984095	0.462059	0.231029	40.513	5.47645	2.73822		1.43136	39.9838	0.55813	45	0.61374	32.9785	1.33315	44.0896
7	1.27984	0.343189	0.171595	38.1339	2.57393	1.28696		1.58712	39.9838	1.39257	39.4698	0.78876	34.3508	1.35089	38.7312
8	1.27102	0.249098	0.124549	40.5905	5.04174	2.52087		1.27807	40.5245	1.58901	44.2645	0.9817	33.4834	1.23529	44.0896
9	1.49638	0.239574	0.119787	40.085	4.16247	2.08124		1.27881	40.0568	1.79402	40.4595	1.58491	34.8238	1.32779	45
10	1.39375	0.268318	0.134159	41.0229	1.18935	0.594673		1.27834	41.7141	1.74852	42.0658	1.1189	39.3895	1.42925	40.9221
S-MB DATK + SP-Css ion-lock 1 in DPPC:POPC:POPG 5:3:2
	minima			maxima				1		2		3		4
Cycle #	Average	S.D.	SEM	Average	S.D.	SEM		minima	maxima	minima	maxima	minima	maxima	minima	maxima
0	30.0668	9.65161	4.8258	30.0668	9.65161	4.8258		44.5055	44.5055	24.298	24.298	25.4869	25.4869	25.9767	25.9767
1	0.695572	0.268803	0.134402	40.9623	2.77153	1.38576		0.6918	44.0464	0.31677	37.4808	0.88062	40.3447	0.8931	41.9773
2	0.760227	0.333044	0.166522	42.7942	3.46833	1.73417		0.76718	42.599	0.29177	39.944	1.04912	40.9046	0.93284	47.7294
3	1.38341	0.503487	0.251743	42.284	2.36894	1.18447		1.12007	42.9376	1.28893	39.3983	1.00635	41.7284	2.11829	45.0719
4	1.13625	0.805808	0.402904	41.705	3.60649	1.80325		0.55868	42.599	1.20263	36.7304	0.53182	42.1411	2.25189	45.3497
5	0.925013	0.745828	0.372914	39.4409	7.12858	3.56429		0.35746	41.0238	0.47028	29.1355	0.88057	42.1132	1.99174	45.4909
6	0.920217	0.718087	0.359043	42.9064	4.79639	2.39819		0.43706	46.934	0.38709	36.2359	0.92197	42.6774	1.93475	45.7782
7	0.7754	0.557509	0.278754	42.8242	5.21075	2.60538		0.4783	42.0004	0.3471	35.7745	0.69221	46.9637	1.58399	46.5583
8	0.876793	0.517467	0.258734	40.3753	6.30864	3.15432		0.71021	41.4075	0.65681	31.3082	0.49891	43.0073	1.64124	45.7782
9	0.826137	0.537197	0.268598	42.8326	4.51231	2.25616		0.62161	42.3338	0.3328	37.6728	0.76457	42.645	1.58557	48.6786
10	0.867443	0.817931	0.408966	41.9334	6.0064	3.0032		0.2713	45	0.40936	35.4946	0.72893	38.5361	2.06018	48.7029
Lipids= DPPC:POPC:POPG 5:3:2
	minima			maxima				1		2		3		4		5		6		7		8
Cycle #	Average	S.D.	S.E.M.	Average	S.D.	S.E.M.		minima	maxima	minima	maxima	minima	maxima	minima	maxima	minima	maxima	minima	maxima	minima	maxima	minima	maxima
0	57.0591	3.87469	1.37012	57.0591	3.87469	1.37012		48.4222	48.4222	57.9329	57.9329	58.3455	58.3455	57.719	57.719	61.3335	61.3335	57.1127	57.1127	59.836	59.836	55.7712	55.7712
1	17.7029	1.16948	0.413537	60.249	1.26679	0.447945		18.7105	57.9885	17.9709	59.836	17.9031	60.9086	19.0905	61.8577	18.2169	61.7132	15.4253	60.0432	17.6353	59.3867	16.671	60.258
2	17.915	1.00477	0.355292	59.8634	1.15895	0.409814		18.4523	57.4583	18.8909	59.5058	19.1083	59.928	18.2201	60.5004	17.9628	61.3853	16.0911	60.2705	17.6262	59.3867	16.9682	60.4725
3	18.1195	1.0282	0.363578	60.5209	2.2254	0.786917		18.5802	56.7303	18.5327	59.7157	18.6055	59.928	18.9428	60.5004	17.9889	64.0703	15.6769	60.0432	18.4629	60.1425	18.1662	63.0365
4	18.0465	0.747232	0.264226	60.4515	2.21884	0.784595		18.3474	56.7303	18.6076	59.7157	19.0074	59.1768	18.5531	60.8262	17.7183	63.4903	16.6539	59.4934	17.5291	60.9086	17.9554	63.2705
5	17.9203	0.888881	0.314314	60.699	1.73846	0.61473		18.9778	57.8718	17.9709	59.599	18.9452	59.7157	18.1688	60.2705	17.3155	63.242	16.4311	61.0585	17.1965	61.1303	18.3567	62.704
6	18.0613	0.991662	0.350658	60.617	2.05563	0.726886		19.3454	57.3404	18.2581	59.3867	19.4203	58.7637	18.07	60.5004	17.0038	63.4903	16.6539	61.6202	17.5725	61.1303	18.1662	62.704
7	18.4152	1.16655	0.412499	61.05	2.81373	0.994955		18.8431	56.4078	19.0074	59.1768	18.9718	58.7637	19.7178	60.7329	17.9889	63.242	16.1903	64.0703	17.3451	61.6852	19.2568	64.3214
8	18.4027	0.774927	0.274019	61.0622	2.67364	0.945416		18.8431	56.6089	18.0152	59.599	19.0899	59.7157	18.596	60.644	18.8208	64.581	17.2181	62.6683	17.3818	60.3595	19.2568	64.3214
9	18.3007	0.633703	0.224082	60.7071	2.42322	0.856866		18.9778	57.3404	18.6737	59.599	18.9615	59.1768	18.5727	58.943	17.8583	63.4903	17.3258	62.6683	17.5725	60.3595	18.4629	64.0797
10	18.3835	0.904102	0.319697	60.7767	3.12864	1.10631		18.7105	56.4078	18.6737	59.599	19.7133	59.5058	19.1941	57.6104	17.7899	64.581	16.8637	64.0703	17.7184	60.3595	18.4045	64.0797

## Sheet: Page 2
Figure 5: CBS data of DEPN-8, DEPN-8:PG-1, S-MB DATK in DEPN-8:PG-1 and S-MB DATK + SP-Css ion-lock 1 in DEPN-8:PG-1
	DEPN-8				DEPN-8:PG-1					S-MB DATK + SP-Css ion-lock 1 in DEPN-8:PG-1			S-MB DATK in DEPN-8:PG-1
	minima		maxima		minima		maxima		minima		maxima		minima		maxima
Cycle #	Average	SEM	Average	SEM	Average	SEM	Average	SEM	Average	SEM	Average	SEM	Average	SEM	Average	SEM
0	38.3437	4.18306	38.3437	4.18306	34.3061	0.553917	34.3061	0.553917	25.7722	1.26536	25.7722	1.26536	40.7951	0.64255	40.7951	0.64255
1	1.40038	0.558874	56.5734	3.75419	0.862255	0.0518643	63.3463	1.34842	0.212855	0.0494565	41.4438	1.30509	0.50239	0.0545181	52.4387	0.39188
2	1.09454	0.308138	59.3202	2.34079	0.750367	0.0414748	66.7888	0.606995	0.205965	0.0555356	41.8006	1.2295	0.492903	0.0520208	52.3295	0.648435
3	1.06594	0.281794	62.2136	1.53903	0.655512	0.0438029	67.6052	0.349149	0.181355	0.051375	41.9678	1.09412	0.49231	0.0520277	53.1867	1.09084
4	1.02275	0.241654	64.7779	1.64812	0.597102	0.0295887	68.4471	0.565417	0.17638	0.0477965	42.1554	0.901423	0.447423	0.0664499	53.3808	1.18128
5	0.91064	0.152701	66.2585	1.46793	0.505788	0.0441069	68.2765	1.02328	0.19683	0.0648518	42.8983	1.15502	0.390063	0.0477558	53.2652	1.29539
6	0.816542	0.108689	66.0784	1.20007	0.464172	0.0545342	68.7015	1.38441	0.191708	0.0605219	43.2962	1.24306	0.395533	0.0155605	55.0792	1.40726
7	0.84681	0.119133	67.0773	1.91431	0.42141	0.0472375	68.334	0.860801	0.20833	0.0577685	42.4113	1.26345	0.387703	0.0235415	55.4229	1.7039
8	0.81518	0.103631	66.8309	1.62722	0.442682	0.0522612	67.5212	0.725227	0.170187	0.0510988	42.9698	1.36797	0.379357	0.018039	54.9682	1.49412
9	0.793408	0.0873444	66.7199	1.92888	0.419625	0.0354924	67.997	0.941024	0.17136	0.0453783	43.096	1.40267	0.406167	0.0245653	55.6	1.30732
10	0.80113	0.0780103	67.509	1.68657	0.42914	0.050903	67.688	1.11716	0.204763	0.0709911	43.1525	1.71868	0.371053	0.0298817	56.2535	1.35571
DEPN-8
	minima			maxima				1		2		3		4
Cycle #	Average	S.D.	SEM	Average	S.D.	SEM		minima	maxima	minima	maxima	minima	maxima	minima	maxima
0	38.3437	8.36611	4.18306	38.3437	8.36611	4.18306		38.164	38.164	31.4074	31.4074	50.1635	50.1635	33.6401	33.6401
1	1.40038	1.11775	0.558874	56.5734	7.50838	3.75419		0.67442	57.9108	0.93115	49.2294	3.06724	66.4819	0.92872	52.6714
2	1.09454	0.616277	0.308138	59.3202	4.68159	2.34079		0.57244	56.6987	0.85157	56.0472	1.98457	66.1914	0.96958	58.3437
3	1.06594	0.563589	0.281794	62.2136	3.07806	1.53903		0.53984	59.3192	0.97344	59.9196	1.86321	65.6213	0.88728	63.9943
4	1.02275	0.483308	0.241654	64.7779	3.29623	1.64812		0.5387	62.7818	0.93284	62.3678	1.69291	64.422	0.92654	69.5398
5	0.91064	0.305403	0.152701	66.2585	2.93586	1.46793		0.53817	66.5355	0.93253	64.422	1.28486	63.783	0.887	70.2934
6	0.816542	0.217378	0.108689	66.0784	2.40015	1.20007		0.50818	65.8627	0.85407	65.6213	1.01749	63.5165	0.88643	69.3131
7	0.84681	0.238266	0.119133	67.0773	3.82861	1.91431		0.50696	68.5192	0.93299	65.6213	1.06086	62.6247	0.88643	71.5439
8	0.81518	0.207261	0.103631	66.8309	3.25443	1.62722		0.50558	69.5583	0.89235	65.9045	0.93653	62.6247	0.92626	69.2361
9	0.793408	0.174689	0.0873444	66.7199	3.85777	1.92888		0.53619	70.9703	0.85407	66.1914	0.85711	61.7465	0.92626	67.9716
10	0.80113	0.156021	0.0780103	67.509	3.37315	1.68657		0.56862	68.8571	0.85422	65.9045	0.89594	63.783	0.88574	71.4915
DEPN-8:PG-1
	minima			maxima				1		2		3		4
Cycle #	Average	S.D.	SEM	Average	S.D.	SEM		minima	maxima	minima	maxima	minima	maxima	minima	maxima
0	34.3061	1.10783	0.553917	34.3061	1.10783	0.553917		35.819	35.819	34.4187	34.4187	33.665	33.665	33.3216	33.3216
1	0.862255	0.103729	0.0518643	63.3463	2.69684	1.34842		0.77584	64.4755	1.01119	65.0654	0.84937	59.321	0.81262	64.5232
2	0.750367	0.0829496	0.0414748	66.7888	1.21399	0.606995		0.6368	66.3986	0.81247	68.4877	0.8119	65.6213	0.7403	66.6478
3	0.655512	0.0876059	0.0438029	67.6052	0.698298	0.349149		0.54074	67.7736	0.74057	68.4877	0.70335	66.8521	0.63739	67.3075
4	0.597102	0.0591774	0.0295887	68.4471	1.13083	0.565417		0.51166	67.0216	0.60293	69.7853	0.63585	68.4207	0.63797	68.5609
5	0.505788	0.0882137	0.0441069	68.2765	2.04657	1.02328		0.39813	66.2754	0.48001	71.1179	0.53943	68.1157	0.60558	67.597
6	0.464172	0.109068	0.0545342	68.7015	2.76882	1.38441		0.34707	65.3416	0.42371	71.4459	0.48001	70.4215	0.6059	67.597
7	0.42141	0.094475	0.0472375	68.334	1.7216	0.860801		0.34692	66.2754	0.34525	69.4132	0.45157	70.0505	0.5419	67.597
8	0.442682	0.104522	0.0522612	67.5212	1.45045	0.725227		0.34702	65.9925	0.37062	69.4132	0.47983	67.7452	0.57326	66.934
9	0.419625	0.0709849	0.0354924	67.997	1.88205	0.941024		0.34728	65.3416	0.37009	69.7297	0.47965	68.7296	0.48148	68.187
10	0.42914	0.101806	0.050903	67.688	2.23432	1.11716		0.29893	64.422	0.39733	69.4132	0.50926	68.7296	0.51104	68.187
S-MB DATK in DEPN-8:PG-1
	minima			maxima				1		2		3
Cycle #	Average	S.D.	SEM	Average	S.D.	SEM		minima	maxima	minima	maxima	minima	maxima
0	40.7951	1.1129	0.64255	40.7951	1.1129	0.64255		40.4816	40.4816	39.8726	39.8726	42.0312	42.0312
1	0.50239	0.0944253	0.0545181	52.4387	0.678737	0.39188		0.54152	52.1379	0.39469	53.2158	0.57096	51.9622
2	0.492903	0.0901001	0.0520208	52.3295	1.12309	0.648435		0.57203	51.4361	0.39484	53.5903	0.51184	51.9622
3	0.49231	0.090112	0.0520277	53.1867	1.88934	1.09084		0.57171	51.6096	0.39437	55.2807	0.51085	52.6699
4	0.447423	0.115091	0.0664499	53.3808	2.04598	1.18128		0.54074	51.7851	0.31882	55.6874	0.48271	52.6699
5	0.390063	0.0827131	0.0477558	53.2652	2.24361	1.29539		0.48089	51.2582	0.31907	55.6874	0.37023	52.8498
6	0.395533	0.0269507	0.0155605	55.0792	2.43737	1.40726		0.39576	52.861	0.36847	57.6885	0.42237	54.6882
7	0.387703	0.0407738	0.0235415	55.4229	2.95116	1.7039		0.39726	53.047	0.343	58.7264	0.42285	54.4952
8	0.379357	0.0312436	0.018039	54.9682	2.58782	1.49412		0.39753	53.047	0.34328	57.9108	0.39726	53.9467
9	0.406167	0.042547	0.0245653	55.6	2.26427	1.30732		0.4523	53.7808	0.36847	58.1359	0.39773	54.8834
10	0.371053	0.051755	0.0298817	56.2535	2.34809	1.35571		0.42277	54.7227	0.31926	58.9569	0.37113	55.0809
S-MB DATK + SP-Css ion-lock 1 in DEPN-8:PG-1
	minima			maxima				1		2		3		4
Cycle #	Average	S.D.	SEM	Average	S.D.	SEM		minima	maxima	minima	maxima	minima	maxima	minima	maxima
0	25.7722	2.53072	1.26536	25.7722	2.53072	1.26536		29.237	29.237	25.2007	25.2007	23.1644	23.1644	25.4865	25.4865
1	0.212855	0.0989129	0.0494565	41.4438	2.61017	1.30509		0.09627	41.6531	0.17573	40.8043	0.32554	38.5051	0.25388	44.8128
2	0.205965	0.111071	0.0555356	41.8006	2.45899	1.2295		0.08338	41.2145	0.17612	42.051	0.35101	38.9955	0.21335	44.9415
3	0.181355	0.10275	0.051375	41.9678	2.18824	1.09412		0.08328	41.7703	0.15842	41.4825	0.32614	39.6769	0.15758	44.9415
4	0.17638	0.0955929	0.0477965	42.1554	1.80285	0.901423		0.0834	41.3301	0.19505	42.7554	0.30202	40.1842	0.12505	44.3518
5	0.19683	0.129704	0.0648518	42.8983	2.31004	1.15502		0.08333	41.5652	0.35141	45.299	0.25644	40.3772	0.09614	44.3518
6	0.191708	0.121044	0.0605219	43.2962	2.48612	1.24306		0.0598	42.1297	0.32554	45.7364	0.25648	40.3772	0.12501	44.9415
7	0.20833	0.115537	0.0577685	42.4113	2.52691	1.26345		0.07113	41.8055	0.32527	45.2549	0.27905	39.2677	0.15787	43.317
8	0.170187	0.102198	0.0510988	42.9698	2.73594	1.36797		0.071	41.8055	0.23474	46.1889	0.27896	39.8655	0.09605	44.0193
9	0.17136	0.0907566	0.0453783	43.096	2.80534	1.40267		0.09627	42.501	0.21412	46.1889	0.27896	39.5481	0.09609	44.1459
10	0.204763	0.141982	0.0709911	43.1525	3.43737	1.71868		0.07094	42.1758	0.30061	46.8361	0.35154	38.8613	0.09596	44.7368

## Sheet: Page 3
Figure 6: Lung function data of lavaged rabbits treated with S-MB DATK, SP-Css ion-lock 1, or both in DPPC:POPC:POPG 5:3:2 wt:wt:wt
Rabbit #	Surfactant	Weight		PaO2	PaO2	PaO2	PaO2	PaO2	PaO2	PaO2	PaO2	PaO2	PaO2		Cdyn	Cdyn	Cdyn	Cdyn	Cdyn	Cdyn	Cdyn	Cdyn	Cdyn	Cdyn
	type	kg		-15	0 min	15 min	30 min	45 min	60 min	75 min	90 min	105 min	120 min		-15	0 min	15 min	30 min	45 min	60 min	75 min	90 min	105 min	120 min
				mmHg											ml/kg/cm H2O
1	S-MB DATK 3% in DPPC:POPC:POPG	1.4		530.1	54.2	349.7	456.3	476.9	460	500.7	567.2	568.6	567.9		0.667028	0.454814	0.46494	0.49327	0.490718	0.492464	0.556995	0.58615	0.590352	0.628502
2	S-MB DATK 3% in DPPC:POPC:POPG	1.2		536.7	36.2	231.6	258.1	308.1	341.3	409.8	415.3	388.6	396.4		0.713954	0.312678	0.424357	0.445916	0.453983	0.481838	0.49041	0.487646	0.488599	0.494929
3	S-MB DATK 3% in DPPC:POPC:POPG	1.3		518.2	37.9	282.9	414.8	486	474.3	467.4	455.3	476.3	498.8		0.598422	0.281059	0.372425	0.380975	0.383225	0.418549	0.479241	0.565631	0.564497	0.521138
4	S-MB DATK 3% in DPPC:POPC:POPG	1.2		544.6	64.8	258.2	292.4	289.4	353	381.6	415.9	434.4	453.7		0.64991	0.360492	0.379085	0.386645	0.42699	0.441024	0.443238	0.442416	0.470683	0.462205
5	S-MB DATK 3% in DPPC:POPC:POPG	1.1		550.2	85.8	227.8	291.5	270.1	282.7	342.4	366.1	375.5	395.4		0.652714	0.433356	0.395548	0.433406	0.451713	0.479963	0.486956	0.469692	0.464395	0.481436
6	S-MB DATK 3% in DPPC:POPC:POPG	1.3		537.3	68.9	255.8	299.9	396.7	484.3	492.9	472.4	477.8	455.9		0.744747	0.394914	0.427613	0.492951	0.514582	0.502366	0.521521	0.513079	0.522996	0.520306
7	S-MB DATK 3% in DPPC:POPC:POPG	1.1		569.5	82.4	365.4	499.3	413.5	394.4	363.5	374.4	417.5	406.8		0.594633	0.330194	0.389905	0.421027	0.414478	0.464854	0.513877	0.499417	0.506489	0.504495
8	S-MB DATK 3% in DPPC:POPC:POPG	1.2		517.2	68.9	219.7	261.1	303.7	310.6	356.8	369.5	384.4	386.2		0.651807	0.344432	0.376798	0.476596	0.4889	0.474379	0.496529	0.503087	0.522407	0.509885
9	S-MB DATK 3% in DPPC:POPC:POPG	1.2		516.3	57.6	295.1	313.7	385.2	439.3	432	454	467.7	458.8		0.629141	0.334597	0.347641	0.39683	0.479427	0.493189	0.449708	0.465478	0.521232	0.561341
Average				535.567	61.8556	276.244	343.011	369.956	393.322	416.344	432.233	443.422	446.656		0.655817	0.360726	0.39759	0.436402	0.456002	0.47207	0.493164	0.503622	0.51685	0.520471
SD				17.6477	17.3642	52.4704	89.6285	80.9502	74.8397	60.0877	64.2675	61.6214	59.2642		0.0490204	0.0568249	0.0355669	0.0440128	0.0420604	0.0269797	0.0352489	0.0465982	0.0411536	0.0490915
SEM				5.88255	5.78807	17.4901	29.8762	26.9834	24.9466	20.0292	21.4225	20.5405	19.7547		0.0163401	0.0189416	0.0118556	0.0146709	0.0140201	0.00899323	0.0117496	0.0155327	0.0137179	0.0163638
10	SP-Css-ion 3% in DPPC:POPC:POPG	1		549	78.3	243.1	284.6	287.1	318	352.2	423.7	469.8	457.4		0.641849	0.393947	0.406522	0.440544	0.460794	0.471627	0.476226	0.464996	0.457683	0.447738
11	SP-Css-ion 3% in DPPC:POPC:POPG	0.9		525.7	36.4	230	229.6	232.5	234.2	236.1	246.8	234.3	237.9		0.696601	0.325802	0.343292	0.39362	0.39677	0.394005	0.394623	0.411414	0.396428	0.416052
12	SP-Css-ion 3% in DPPC:POPC:POPG	1		548.1	66.5	247.3	251.7	251.1	250.9	271.7	261.7	265	332.3		0.621203	0.315636	0.339534	0.331695	0.37828	0.463246	0.41737	0.46728	0.43743	0.423645
13	SP-Css-ion 3% in DPPC:POPC:POPG	1.1		515.8	53.5	270.2	251.6	261.5	278.3	301.2	352.8	295.5	307.3		0.633681	0.338689	0.371978	0.373361	0.392119	0.401677	0.431382	0.423844	0.466373	0.494952
14	SP-Css-ion 3% in DPPC:POPC:POPG	1.2		541.4	57.9	297.9	370.6	439	451.2	484	392.4	394	400.7		0.700833	0.391997	0.437013	0.462023	0.478771	0.553144	0.567551	0.56852	0.533769	0.518593
15	SP-Css-ion 3% in DPPC:POPC:POPG	1.1		526.8	52.1	236.4	333.7	329.9	328.3	327.7	331.4	342.2	363.8		0.632409	0.342	0.338346	0.375818	0.38699	0.383442	0.401121	0.409087	0.448184	0.451012
Average				534.467	57.45	254.15	286.967	300.183	310.15	328.817	334.8	333.467	349.9		0.654429	0.351345	0.372781	0.396177	0.415621	0.444523	0.448046	0.457523	0.456644	0.458665
SD				13.6326	14.1715	25.4518	54.7167	75.9091	78.2043	86.3149	70.2056	87.5106	76.1559		0.0349554	0.0335934	0.0410502	0.0477571	0.0427791	0.0648111	0.0653457	0.0601294	0.0449682	0.0403195
SEM				5.56658	5.78664	10.3927	22.3425	30.9959	31.9331	35.2449	28.6671	35.7332	31.0967		0.0142733	0.0137172	0.016762	0.0195006	0.017468	0.0264643	0.0266826	0.0245526	0.0183619	0.0164636
16	S-MB+SP-Css-ion1 3%in DPPC:POPC:POPG	1.2		555.2	83.4	272.5	331.5	302.6	374.5	449.4	395.5	462.9	485.1		0.689655	0.367974	0.39239	0.470922	0.484538	0.486421	0.547059	0.568214	0.583368	0.593822
17	S-MB+SP-Css-ion1 3%in DPPC:POPC:POPG	1.3		531.9	87.1	348.5	403.1	417.8	415.8	439.9	525.4	544.6	570		0.670386	0.372884	0.422113	0.462963	0.470687	0.51966	0.53066	0.572148	0.613636	0.593636
18	S-MB+SP-Css-ion1 3%in DPPC:POPC:POPG	1.2		537.5	86.3	376.2	400	403.1	422.4	466.8	439.9	462.7	487.4		0.643404	0.384783	0.407873	0.475517	0.54458	0.52521	0.526015	0.506757	0.499906	0.508891
19	S-MB+SP-Css-ion1 3% in DPPC:POPC:POPG	1.3		530.9	90.9	329	351.8	388.3	422.5	412.3	430.1	459.1	435.8		0.635	0.353	0.41	0.475	0.498	0.516	0.512	0.529	0.513	0.542
20	S-MB+SP-Cs-sion1 3% in DPPC:POPC:POPG	1.2		554	93.4	363	426.4	436.6	451.5	444.2	452.2	452.5	431.8		0.652	0.346	0.406	0.483	0.519	0.537	0.521	0.525	0.553	0.589
Average				541.9	88.22	337.84	382.56	389.68	417.34	442.52	448.62	476.36	482.02		0.658089	0.364928	0.407675	0.47348	0.503361	0.516858	0.527347	0.540224	0.552582	0.56547
SD				11.8708	3.94297	40.5142	39.3741	51.8583	27.644	19.7471	47.8245	38.3786	55.7612		0.0219856	0.0155509	0.0106107	0.00731844	0.0291298	0.0187781	0.0130109	0.0286373	0.0474792	0.0384151
SEM				5.30893	1.7634	18.1191	17.6092	23.1925	12.3632	8.83143	21.3884	17.164	24.9379		0.00983257	0.00695479	0.00474538	0.00327301	0.0130276	0.00839809	0.00581882	0.0128074	0.021234	0.0171803
21	DPPC:POPC:POPG 5:3:2	1.25		543	52	81.9	84.2	86.9	96.1	155.5	164.4	157.5	119		0.606617	0.313878	0.32027	0.326795	0.323213	0.313214	0.31011	0.298882	0.290468	0.32889
22	DPPC:POPC:POPG 5:3:2	1.1		552.6	59.3	136.7	71.7	89.6	69.7	66.4	67.7	53.4	48.7		0.696089	0.40137	0.400877	0.349028	0.381858	0.368284	0.33926	0.332067	0.326668	0.335637
23	DPPC:POPC:POPG 5:3:2	1.1		546.6	48	65.9	123.1	112.3	82.6	68.5	75.5	59.5	60.5		0.69532	0.347226	0.417549	0.387666	0.451718	0.407143	0.393132	0.421679	0.396846	0.386323
24	DPPC:POPC:POPG 5:3:2	1.3		553.5	91.7	87.6	68.6	81.3	121.4	84.5	80.3	93.4	84.5		0.684256	0.441791	0.374741	0.430123	0.345782	0.429335	0.471644	0.442495	0.441574	0.346331
25	DPPC:POPC:POPG 5:3:2	1.4		583.3	39.1	40.4	49.7	124.1	129.4	171.3	113	108.1	126.9		0.676111	0.326413	0.334995	0.328353	0.338407	0.339188	0.329948	0.327117	0.315454	0.298862
26	DPPC:POPC:POPG 5:3:2	1.1		605.4	55.1	88.4	87.5	101.6	213.8	165.2	117.9	134.2	153.9		0.585938	0.399698	0.360824	0.353432	0.34316	0.379755	0.369623	0.362379	0.337867	0.31963
27	DPPC:POPC:POPG 5:3:2	1.3		619.4	38	41.5	47.1	51.6	50.9	53.2	41.3	39.7	36.6		0.688073	0.350881	0.346415	0.341304	0.333971	0.344871	0.330258	0.355016	0.345531	0.342624
28	DPPC:POPC:POPG 5:3:2	1.2		566.2	46.3	51	101.1	94.3	101.5	81.2	84.9	83.5	88.8		0.616994	0.353787	0.360588	0.389887	0.39642	0.396774	0.387416	0.399108	0.385654	0.385
29	DPPC:POPC:POPG 5:3:2	1.2		537.1	32.9	132.5	114.8	109.4	172.3	138.7	112.6	79.9	51.5		0.661877	0.329414	0.349499	0.351359	0.361805	0.303698	0.424476	0.428703	0.388725	0.373894
Average				567.456	51.3778	80.6556	83.0889	94.5667	115.3	109.389	95.2889	89.9111	85.6		0.656808	0.362718	0.362862	0.361994	0.364037	0.364696	0.372874	0.37416	0.358754	0.346354
SD				29.0701	17.3609	35.6886	26.6956	21.1005	51.2864	47.4664	35.8837	38.3946	40.3934		0.0422528	0.0424066	0.0308746	0.0339705	0.0403976	0.0428127	0.052176	0.0508454	0.0475795	0.0301101
SEM				9.69003	5.78698	11.8962	8.89852	7.03349	17.0955	15.8221	11.9612	12.7982	13.4645		0.0140843	0.0141355	0.0102915	0.0113235	0.0134659	0.0142709	0.017392	0.0169485	0.0158598	0.0100367

## Sheet: Page 4
Figure 7: Lung function data of lavaged rats treated with phospholipase-resistant surfactants with S-MB DATK or S-MB DATK + SP-Css ion-lock 1 or DEPN-8 alone
Rat #	Surfactant type	Weight		PaO2	PaO2	PaO2	PaO2	PaO2	PaO2	PaO2	PaO2		Cdyn	Cdyn	Cdyn	Cdyn	Cdyn	Cdyn	Cdyn	Cdyn
		g		-15	0 min	15 min	30 min	45 min	60 min	75 min	90 min		-15	0 min	15 min	30 min	45 min	60 min	75 min	90 min
DEPN-8 alone				mmHg									ml/kg/cm H2O
1	DEPN-8	206		530.3	78.9	65.8	68.1	68.2	75.2	78.7	84.9		0.603232	0.362871	0.321337	0.331443	0.337292	0.342374	0.34379	0.34923
2	DEPN-8	227		546.5	59.3	53.3	66.6	72.9	73	79.2	87.5		0.53909	0.314641	0.299744	0.325284	0.32722	0.333868	0.335312	0.337104
3	DEPN-8	237		459.8	88.9	94.8	111.2	131.8	172.7	228.9	265.2		0.608519	0.365509	0.373258	0.379463	0.382405	0.39127	0.394369	0.401661
4	DEPN-8	199		629.9	60.9	93.5	95.9	102.7	114.2	113	115.9		0.707643	0.301878	0.342673	0.344419	0.34667	0.348472	0.342491	0.344432
5	DEPN-8	198		530.4	69.8	69.4	79.3	86	86.6	89.3	99.6		0.625714	0.311555	0.33429	0.336429	0.340568	0.341585	0.348812	0.35262
6	DEPN-8	218		595.5	78.3	65.7	73	78.6	87.1	94.9	106.3		0.731945	0.380613	0.35256	0.370118	0.356662	0.360719	0.358556	0.354946
7	DEPN-8	213		522.8	66.2	57.3	57.5	67.1	76.4	86.4	95.8		0.683435	0.323852	0.304496	0.326229	0.340098	0.342389	0.350575	0.35481
8	DEPN-8	214		416.2	64.4	59.1	53.7	55.5	61.8	65.4	70.5		0.610558	0.347719	0.304745	0.324491	0.326568	0.339593	0.377226	0.451888
Average				528.925	70.8375	69.8625	75.6625	82.85	93.375	104.475	115.712		0.638767	0.33858	0.329138	0.342235	0.344685	0.350034	0.356391	0.368336
SD				68.1006	10.3014	15.8683	19.4361	24.2835	35.5408	52.144	61.9686		0.0638085	0.0293571	0.0262734	0.0213031	0.0181111	0.0184231	0.0198878	0.0389372
SEM				24.0808	3.64266	5.61114	6.87274	8.58681	12.5675	18.4385	21.9125		0.0225631	0.0103809	0.00929044	0.00753291	0.0064042	0.00651454	0.00703246	0.0137684
S-MB DATK + SP-Css ion-lock 1 in DEPN-8:PG-1
9	S-MB DATK+SP-Css ion-lock 1	219		572.8	95.4	110.2	219.6	336.8	417.2	377.8	441.3		0.62015	0.425225	0.491506	0.522956	0.526433	0.554187	0.569405	0.582943
10	S-MB DATK+SP-Css ion-lock 1	229		537.7	86.6	107	251.8	372	409.6	347.8	395.4		0.593084	0.413787	0.494634	0.529146	0.557375	0.559154	0.547492	0.568248
11	S-MB DATK+SP-Css ion-lock 1	231		516.8	77.3	226.6	398.8	529.5	584.8	599.4	636.1		0.611357	0.371845	0.436546	0.485562	0.484675	0.484183	0.492622	0.489814
12	S-MB DATK+SP-Css ion-lock 1	207		530.1	90.9	164	485.4	496.5	509	549.4	551.5		0.620434	0.375674	0.472678	0.489113	0.514874	0.506009	0.519903	0.520251
13	S-MB DATK+SP-Css ion-lock 1	222		517.9	74.6	125	230.3	305.4	414.4	497.4	524.8		0.704446	0.390692	0.427137	0.416023	0.414121	0.412534	0.421578	0.435316
14	S-MB DATK+SP-Css ion-lock 1	202		481.1	57.8	160.1	265.3	276.3	299.9	327.4	278.6		0.769949	0.301284	0.323845	0.33295	0.355428	0.391188	0.399667	0.403042
15	S-MB DATK+SP-Css ion-lock 1	212		493.8	88	181.7	322.3	328.2	320.8	383.1	404.9		0.675338	0.437787	0.450975	0.438197	0.4658	0.463496	0.462148	0.474437
Average				521.457	81.5143	153.514	310.5	377.814	422.243	440.329	461.8		0.656394	0.388042	0.442475	0.459135	0.474101	0.481536	0.487545	0.496293
SD				30.0072	12.7591	43.093	98.9189	97.3151	99.5463	107.204	118.339		0.0635161	0.0455875	0.0583846	0.069272	0.0697581	0.0647536	0.0633599	0.0660723
SEM				11.3406	4.82204	16.2861	37.3843	36.7782	37.6214	40.5157	44.7237		0.0240046	0.0172288	0.0220652	0.0261799	0.0263636	0.0244723	0.0239456	0.0249706
S-MB DATK in DEPN-8:PG-1
16	S-MB DATK	221		559	68.7	107.6	316.8	375.6	399.9	409.3	517.8		0.682734	0.349606	0.380058	0.370883	0.344745	0.352336	0.365678	0.349628
17	S-MB DATK	206		567.2	54.5	156	278.3	301.2	347.9	320.8	377.7		0.610278	0.277089	0.292099	0.327827	0.32967	0.329936	0.32957	0.364535
18	S-MB DATK	239		550.5	76.9	115.6	229.5	350.9	381.3	386.2	519.6		0.63603	0.48	0.405791	0.443711	0.494522	0.5356	0.578194	0.576986
19	S-MB DATK	219		473.5	53.9	162.7	296	327	378.1	429.8	410.7		0.678256	0.331055	0.452576	0.474724	0.491127	0.513369	0.494044	0.526254
20	S-MB DATK	226		494.32	77.6	113.9	219.9	298.5	362.2	307.4	340.7		0.610307	0.361234	0.367013	0.385388	0.393568	0.398202	0.401271	0.401415
21	S-MB DATK	211		449.8	91.5	158.7	353.9	421	467.1	489.5	510.7		0.599436	0.438562	0.349871	0.372951	0.410426	0.563128	0.561517	0.552198
22	S-MB DATK	232		503.9	66.6	137	238.2	240.1	236.1	339.5	348.1
23	S-MB DATK	240		482.7	69.8	176.7	209.3	239.1	256.5	270.8	346.3
Average				510.115	69.9375	141.025	267.738	319.175	353.637	369.163	421.45		0.636174	0.372924	0.374568	0.395914	0.410676	0.448762	0.455046	0.461836
SD				43.5851	12.4231	26.1719	51.7954	63.2853	75.3417	72.4745	81.4689		0.036409	0.0740154	0.0539599	0.0536584	0.0702909	0.100766	0.104542	0.101275
SEM				15.412	4.3929	9.25458	18.3152	22.3781	26.6413	25.6275	28.8079		0.0148669	0.0302227	0.0220334	0.0219103	0.0287019	0.0411456	0.0426875	0.0413537
